# Supplementary material for: 2,6-Bis(benzimidazol-2-yl)pyridine complexes of group 14 elements
Source: Royal Society of Chemistry journal article supplement (doi:10.1039/c9dt00995g), 2019-01-01
Supplement: c9dt00995g1.pdf [file c9dt00995g1.pdf]

## Computational Information

### General Remarks

Calculations were performed with the Gaussian 09 suite of programs<sup>1</sup> using Compute Canada's Shared Hierarchical Academic Research Computing Network (SHARCNET). Model complexes were fully optimized with no symmetry constraints using the M06-2X density functional method,<sup>2</sup> in conjunction with the cc-pVTZ basis set.<sup>3,4</sup> The cc-pVQZ-PP basis set employing a relativistic small-core pseudopotential was used for tin.<sup>3,27</sup> Geometry optimizations were started using models in which the relevant non-hydrogen atoms were placed in positions found experimentally by X-ray crystallography using Gaussview.<sup>5</sup> Frequency calculations were also performed at the same level of theory in order to confirm that the optimized structures were minima on the potential energy hypersurface and to determine thermochemical and vibrational information. Natural bond orbital (NBO) analyses<sup>6</sup> to determine orbital contributions, Wiberg Bond Indices and orbital energies were obtained using the routine included in the Gaussian distributions.<sup>7</sup> Visualizations of the Kohn-Sham orbitals and optimized geometries were made using VMD.<sup>8</sup>

### Parameters for [ClGeBZIMPY]<sup>+</sup>

```
1\1\GINC-ORC173\FOpt\RM062X\CC-pVTZ\C11H9Cl1Ge1N5(1+)\BINDERJ\29-Mar-2
018\0\#\# M062X/cc-pVTZ scf=tight opt=tight freq pop=(full,nbo6read)\O
ptimization, frequency test and nbo analysis for GeCl Bzimpy AS660\1,
1\Ge,8.0028513179,19.9613278499,11.7137966787\Cl,7.2149874609,22.01844
84919,11.9613420282\N,9.9855257119,20.6592524954,11.0268368518\N,9.309
3505474,20.3585851281,13.5748460754\N,7.8909222358,20.3134790894,9.435
2880881\N,8.9241565878,20.7060665323,7.5485898615\C,10.2240572664,20.8
248056413,9.7185542342\C,9.0474409252,20.6194717267,8.8899227938\C,10.
9751130874,20.8486701956,11.9104347609\C,6.9874078207,20.1935794807,8.
4214395016\C,7.6189325242,20.4392158987,7.2348225095\C,11.4810706663,2
1.1689041878,9.2431829029\C,12.5068802606,21.3504625756,10.1553586457\
C,12.2572107646,21.1935643251,11.5082667225\N,11.2798585784,20.7808913
581,14.4234247893\C,9.2182222931,20.2644905388,14.9318436914\C,10.5552
540897,20.6673840311,13.2903155389\C,10.4430915117,20.5289403403,15.47
68052647\H,10.7806872798,20.5622830413,16.4965166526\H,8.2954832087,20
.0262273895,15.4301564135\H,12.2579554677,21.0093805655,14.4968572017\
H,9.6501628701,20.9265804851,6.8863497918\H,7.2600370387,20.4504474667
,6.2219246524\H,5.9545754645,19.9517934229,8.5984397329\H,11.654765097
8,21.297807538,8.1849605832\H,13.4962802015,21.6196225628,9.813406361\
H,13.0424843414,21.3419019713,12.2348763518\\Version=EM64L-G09RevE.01\
State=1-A\HF=-3235.4772563\RMSD=6.374e-09\RMSF=6.544e-06\Dipole=3.1436
943,-0.1846627,-1.0752185\Quadrupole=0.8127657,-30.754729,29.9419633,8
.3368035,11.1972899,-2.1544747\PG=C01 [X(C11H9Cl1Ge1N5)]\@\
```

|                                              |                             |
|----------------------------------------------|-----------------------------|
| Zero-point correction=                       | 0.198204 (Hartree/Particle) |
| Thermal correction to Energy=                | 0.213304                    |
| Thermal correction to Enthalpy=              | 0.214248                    |
| Thermal correction to Gibbs Free Energy=     | 0.154100                    |
| Sum of electronic and zero-point Energies=   | -3235.279052                |
| Sum of electronic and thermal Energies=      | -3235.263952                |
| Sum of electronic and thermal Enthalpies=    | -3235.263008                |
| Sum of electronic and thermal Free Energies= | -3235.323156                |

### Parameters for [ClSnBZIMPY]<sup>+</sup>

```
1\1\GINC-ORC267\FOpt\RM062X\Gen\C11H9Cl1N5Sn1(1+)\BINDERJ\15-Apr-2018\
0\#\# M062X/gen pseudo=read scf=tight opt=tight freq pop=(full,nbo6read)
)\Optimization, frequency test and nbo analysis for SnCl Bzimpy AS662
cc-pVTZ (-PP for Sn atom)\1,1\Sn,-0.0000027768,-1.4963696488,-0.4506
328965\Cl,-0.0000002437,-1.5922305738,1.9475478694\N,0.0000068119,0.94
38292112,-0.1676756477\N,2.2741405313,-0.5402240414,-0.2827710112\N,-2
.2741350335,-0.540208122,-0.2827695239\N,-3.6337659958,1.1577349714,-0
.0657470856\C,-1.1548893529,1.607012843,-0.0472340331\C,-2.3437965446,
0.7658610439,-0.1356318544\C,1.1549079109,1.6070039581,-0.0472315051\C
,-3.5562858779,-1.008014514,-0.3110386222\C,-4.4181239432,0.0417898028
,-0.174726611\C,-1.1956535291,2.9785178921,0.1654472659\C,0.0000168826
,3.6682397215,0.2654765866\C,1.1956822923,2.9785083875,0.1654519497\N,
3.6337814217,1.1577084715,-0.0657384272\C,3.5562871616,-1.0080408483,-
0.311037411\C,2.3438100494,0.7658438537,-0.1356275867\C,4.4181313325,0
.041757833,-0.1747205303\H,5.4912527471,0.0897692865,-0.144537672\H,3.
7832502534,-2.0537611297,-0.4188329561\H,3.973549125,2.0989290549,0.04
59836229\H,-3.9735277274,2.098958241,0.0459685368\H,-5.491245418,0.089
8088546,-0.1445453164\H,-3.7832565237,-2.0537334673,-0.4188302869\H,-2
.1375164963,3.4984191595,0.2611540783\H,0.0000206887,4.73614664,0.4322
366163\H,2.1375492545,3.4984021189,0.2611624517\Version=EM64L-G09RevE
.01\State=1-A\HF=-1372.6999191\RMSD=3.450e-09\RMSF=3.556e-06\Dipole=0.
000003,3.2933938,-0.9856054\Quadrupole=32.3723248,1.9242016,-34.296526
4,-0.0001233,0.0000978,5.8333335\PG=C01 [X(C11H9Cl1N5Sn1)]\@\
```

```
Zero-point correction=          0.197677 (Hartree/Particle)
Thermal correction to Energy=    0.213051
Thermal correction to Enthalpy=  0.213995
Thermal correction to Gibbs Free Energy=  0.152541
Sum of electronic and zero-point Energies= -1372.502242
Sum of electronic and thermal Energies= -1372.486868
Sum of electronic and thermal Enthalpies= -1372.485924
Sum of electronic and thermal Free Energies= -1372.547378
```

### Parameters for [GeBZIMPY]

```
1\1\GINC-GRA103\FOpt\RM062X\CC-pVTZ\C11H9Ge1N5\BINDERJ\11-Apr-2019\0\
#\# M062X/cc-pVTZ scf=tight opt=tight freq pop=(full,nbo6read)\Optimiza
tion, frequency test and nbo analysis for Ge0Bzimpy\0,1\Ge,8.19885548
42,20.2494322899,11.9661896151\N,9.8714861599,20.6767511528,11.1268885
354\N,9.3707010653,20.408468506,13.5790370782\N,7.7813379302,20.323332
558,9.3442277525\N,8.9710825496,20.704537417,7.5347765815\C,10.1241825
145,20.8204942793,9.7582455691\C,8.9801915557,20.6199045727,8.89451392
29\C,10.9982678396,20.8747849474,11.9703264264\C,6.9706095772,20.21219
33887,8.24550866\C,7.6903797371,20.4452131682,7.1131708342\C,11.354775
8504,21.1267705323,9.2680101663\C,12.4713769239,21.3218212949,10.12255
05388\C,12.2634830093,21.1897800543,11.4646683909\N,11.3533649447,20.7
93842877,14.4842358954\C,9.2602324608,20.2958237078,14.958412026\C,10.
658630744,20.7137667422,13.3051195475\C,10.4673874624,20.5301641258,15
.5141979583\H,10.7773512217,20.5338379835,16.5429204839\H,8.3276372846
,20.0569339851,15.4362249957\H,12.328116942,21.0055255959,14.580833869
5\H,9.7546489735,20.9172566352,6.9445195647\H,7.4194926618,20.45095586
```

15,6.0733376569\H,5.9255591658,19.9729684999,8.3347519365\H,11.4841855  
984,21.2238759808,8.1987765491\H,13.4415967903,21.5643911285,9.7188266  
68\H,13.0769801732,21.3268260453,12.1665554571\\Version=EM64L-G09RevE.  
01\State=1-A\HF=-2775.3805236\RMSD=7.201e-09\RMSF=2.115e-06\Dipole=1.2  
95088,0.3045818,-0.2381974\Quadrupole=-3.3747058,-15.0632863,18.437992  
2,2.3322659,6.3836899,-0.7455118\PG=C01 [X(C11H9Ge1N5)]\@

Zero-point correction= 0.193556 (Hartree/Particle)  
Thermal correction to Energy= 0.207072  
Thermal correction to Enthalpy= 0.208016  
Thermal correction to Gibbs Free Energy= 0.152441  
Sum of electronic and zero-point Energies= -2775.186967  
Sum of electronic and thermal Energies= -2775.173451  
Sum of electronic and thermal Enthalpies= -2775.172507  
Sum of electronic and thermal Free Energies= -2775.228083

### Parameters for [GeDIMPY]

1\1\GINC-GRA103\FOpt\RM062X\CC-pVTZ\C7H7Ge1N3\BINDERJ\10-Apr-2019\0\\#  
M062X/cc-pVTZ scf=tight opt=tight freq pop=(full,nbo6read)\Optimizat  
ion, frequency test and nbo analysis for GeO Dimpy\0,1\Ge,8.266917467  
2,20.2446136191,11.9986516293\N,9.9271893154,20.6661984806,11.11315937  
81\N,9.3959019441,20.3735747207,13.5225120415\N,7.9062750321,20.371892  
0747,9.2406213901\C,10.1768040594,20.8201654236,9.7588520538\C,9.07240  
98307,20.6526900335,8.8251087329\C,11.0197274332,20.8355192497,11.9878  
770737\C,11.4089786884,21.1203429278,9.2728665178\C,12.5193498015,21.2  
931800401,10.1517520287\C,12.3103789129,21.1498054215,11.4807941856\C,  
10.7024816454,20.6697500977,13.3055463493\H,11.5298498901,21.225551151  
7,8.2037710508\H,13.4962149617,21.5317711422,9.7583794167\H,13.1141601  
507,21.2690870324,12.1956005014\H,7.2352770106,20.2842824377,8.4824894  
961\H,9.1011157641,20.2395537913,14.4771056697\H,9.3311138472,20.78622  
63466,7.772500685\H,11.4186892653,20.7637318991,14.1079941695\\Version  
=EM64L-G09RevE.01\State=1-A\HF=-2512.2525145\RMSD=4.067e-09\RMSF=6.478  
e-06\Dipole=0.6167291,0.1542488,-0.2974328\Quadrupole=-2.0867245,-7.25  
00012,9.3367256,1.0226987,1.9468991,-0.8339767\PG=C01 [X(C7H7Ge1N3)]\@

Zero-point correction= 0.135237 (Hartree/Particle)  
Thermal correction to Energy= 0.144398  
Thermal correction to Enthalpy= 0.145342  
Thermal correction to Gibbs Free Energy= 0.100270  
Sum of electronic and zero-point Energies= -2512.117277  
Sum of electronic and thermal Energies= -2512.108117  
Sum of electronic and thermal Enthalpies= -2512.107173  
Sum of electronic and thermal Free Energies= -2512.152245

### Parameters for [ClGeDIMPY]

1\1\GINC-GRA6\FOpt\RM062X\CC-pVTZ\C7H7Cl1Ge1N3(1+)\CMACD\13-Apr-2019\0  
\\# M062X/cc-pVTZ scf=tight opt=tight freq pop=(full,nbo6read) test\O

ptimization of ClGe(dimpy) cation\\1,1\Ge,-1.7737868444,0.0104286938,0.2328835907\Cl,-2.1172285766,0.0203294923,-1.9470658443\N,0.3643591032,0.0002079308,0.1204350289\N,-1.0727951445,-2.1556994756,-0.0035084448\N,-1.0512494916,2.1711814759,0.0127027484\C,1.0389685781,1.1524703203,0.1656845799\C,0.1942803941,2.3586318102,0.1183832477\C,1.0274559529,-1.159024314,0.1570530947\C,2.4223456773,1.1856649528,0.2516700187\C,3.1172988177,-0.0141255245,0.2870449251\C,2.410430395,-1.2066369289,0.2427419523\C,0.1708011004,-2.3563245919,0.1007625818\H,2.9372554188,2.1358265469,0.2828817581\H,4.1964768524,-0.0197240582,0.3466259719\H,2.9158500346,-2.1620865736,0.2668451243\H,-1.6312763443,3.0063243626,-0.0112312779\H,-1.6611021166,-2.9848283463,-0.0336475295\H,0.6674512931,3.3360630472,0.1781604582\H,0.6342089405,-3.3388384198,0.1532614657\\Version=EM64L-G09RevE.01\State=1-A\HF=-2972.2902525\RMSE=7.010e-09\RMSF=3.728e-06\Dipole=2.6211752,-0.0175488,1.1982929\Quadrupole=5.3399918,14.4951636,-19.8351554,0.0435612,0.5491445,0.1255032\PG=C01 [X(C7H7Cl1Ge1N3)]\@

|                                              |                             |
|----------------------------------------------|-----------------------------|
| Zero-point correction=                       | 0.138314 (Hartree/Particle) |
| Thermal correction to Energy=                | 0.149455                    |
| Thermal correction to Enthalpy=              | 0.150400                    |
| Thermal correction to Gibbs Free Energy=     | 0.100315                    |
| Sum of electronic and zero-point Energies=   | -2972.151938                |
| Sum of electronic and thermal Energies=      | -2972.140797                |
| Sum of electronic and thermal Enthalpies=    | -2972.139853                |
| Sum of electronic and thermal Free Energies= | -2972.189937                |

NMR Data:

Compound 1:

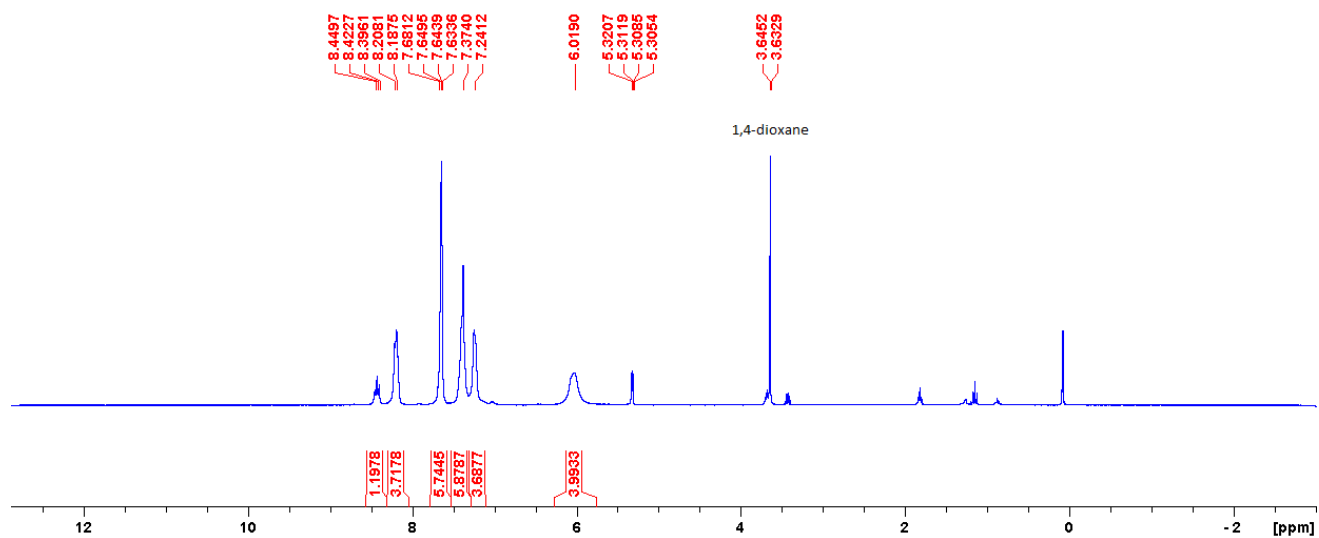

<sup>1</sup>H NMR of compound **1**.

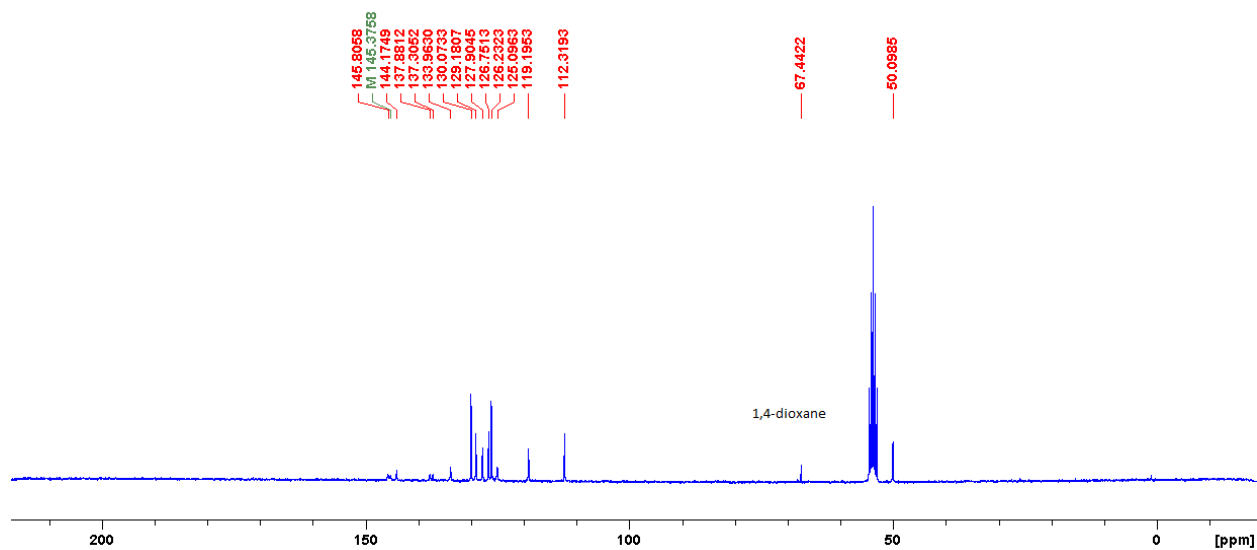

<sup>13</sup>C NMR of compound **1**.

Compound **2**:

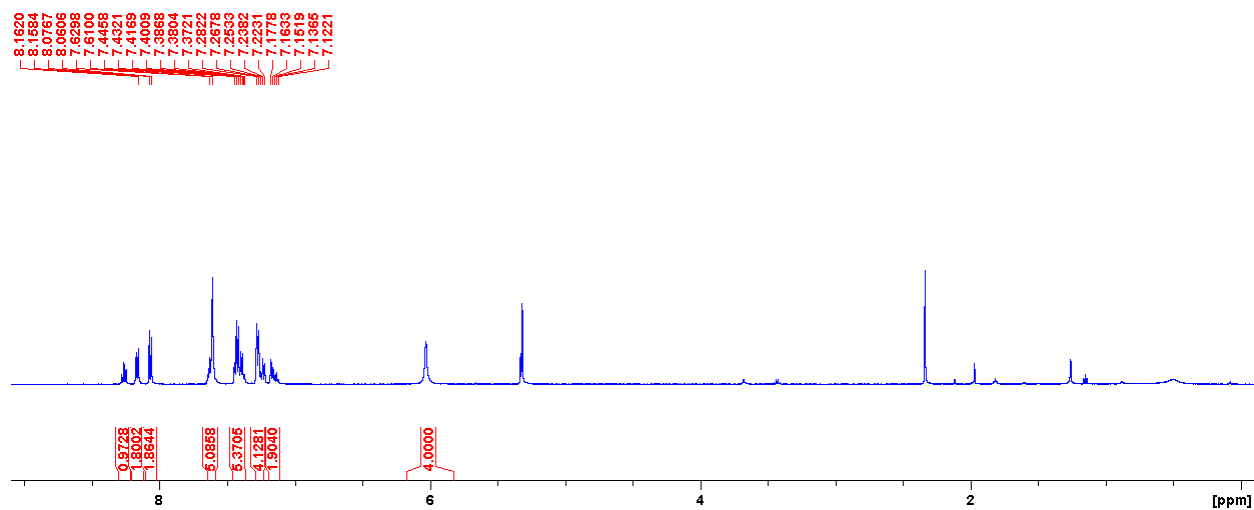

<sup>1</sup>H NMR of compound 2.

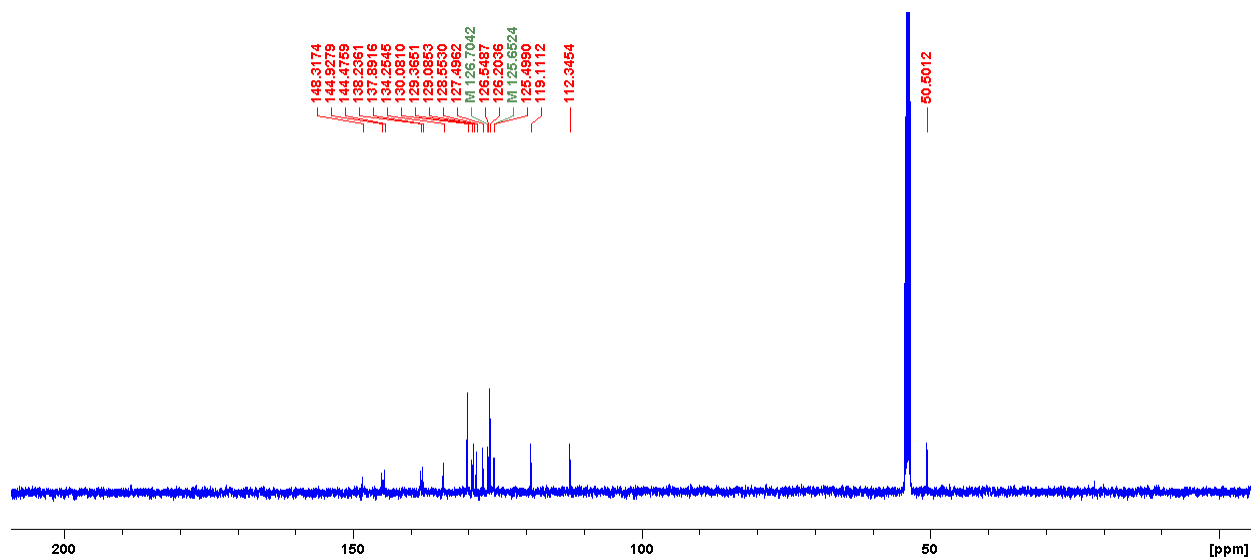

<sup>13</sup>C NMR of compound 2.

Compound 3:

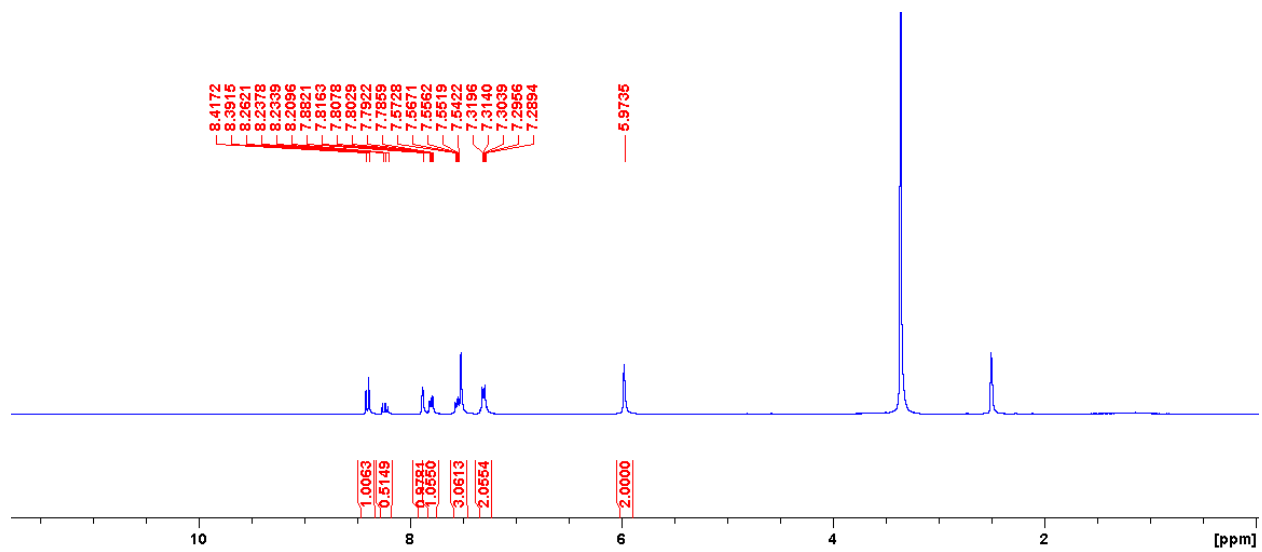

<sup>1</sup>H NMR of compound 3.

DPX300

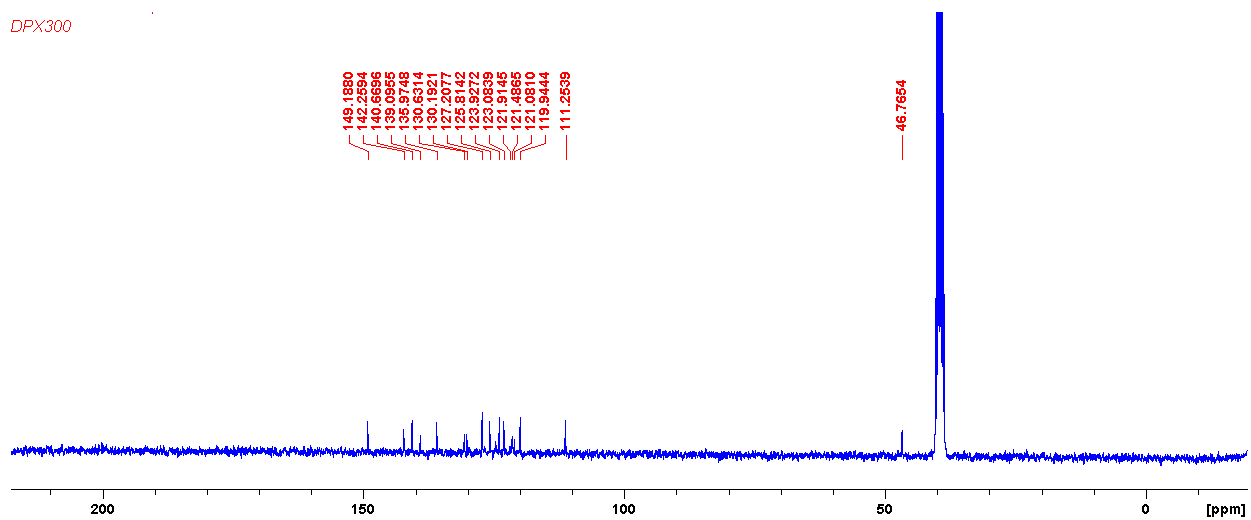

<sup>13</sup>C NMR of compound 3.

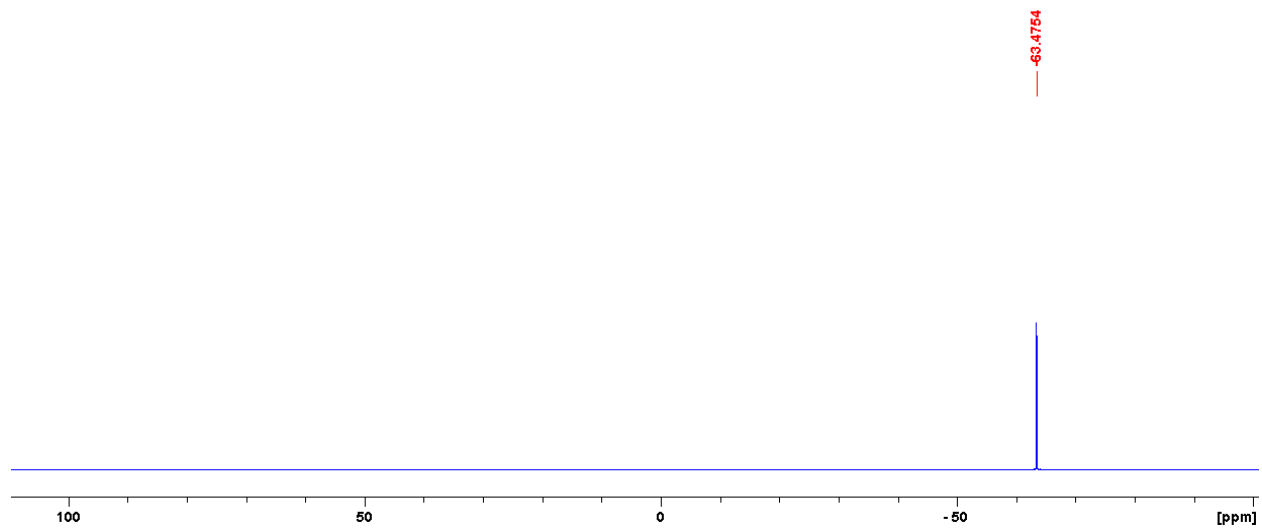

<sup>19</sup>F NMR of compound 3.

Compound 4:

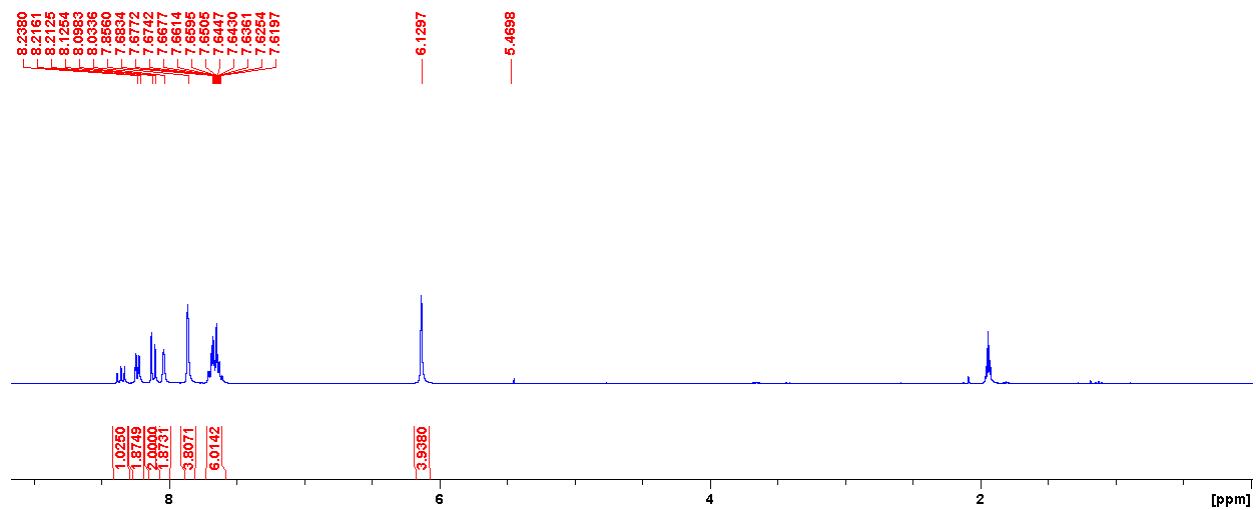

<sup>1</sup>H NMR of compound 4.



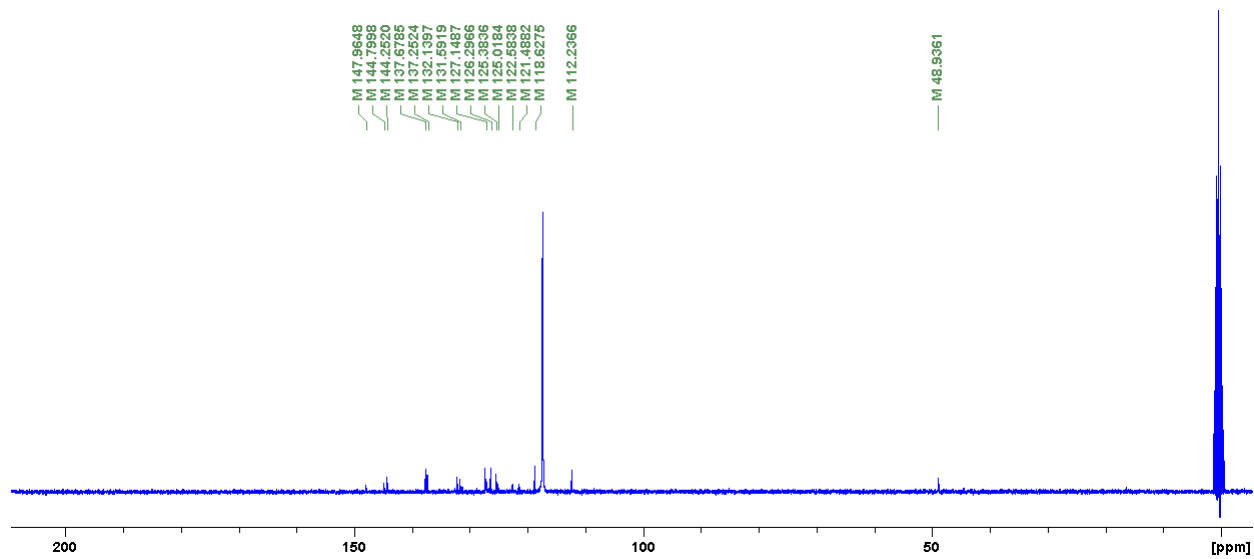

<sup>13</sup>C NMR of compound 4.

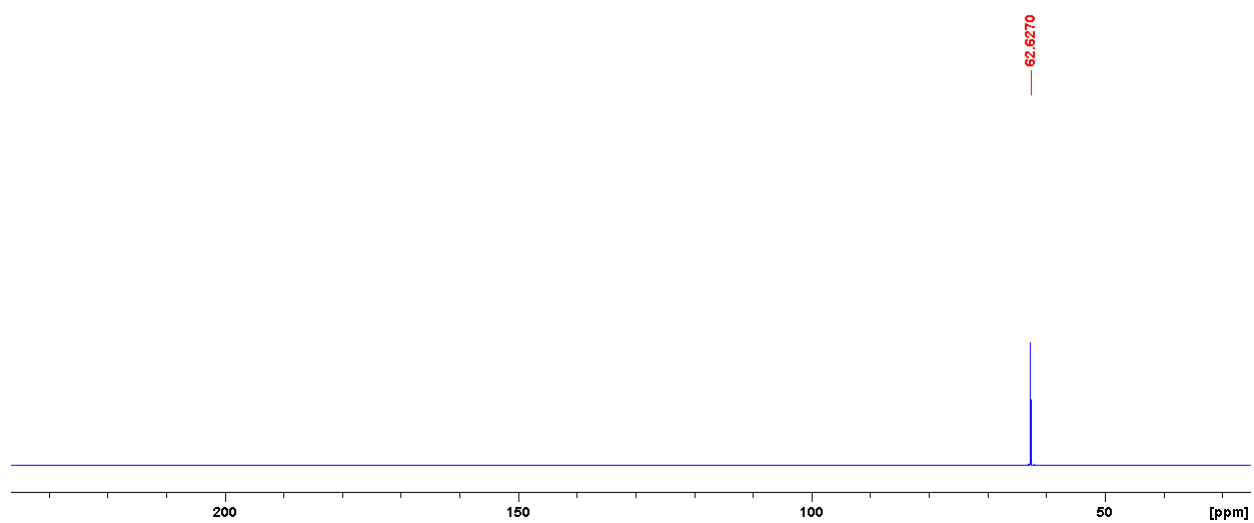

<sup>19</sup>F NMR of compound 4.

Compound 5:

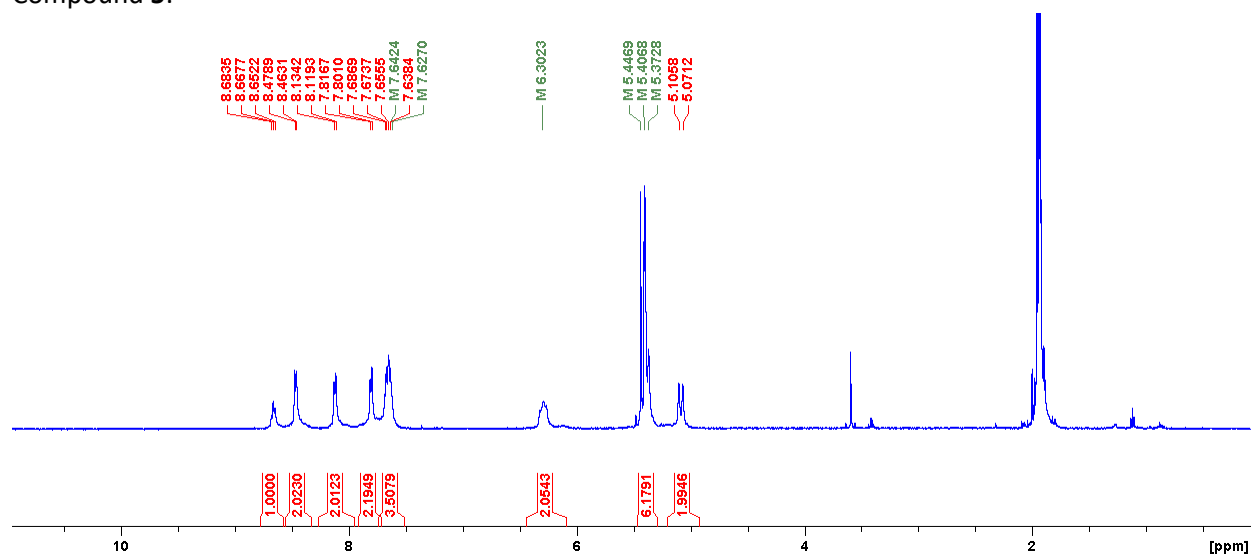

<sup>1</sup>H NMR of compound 5.

Compound 6:

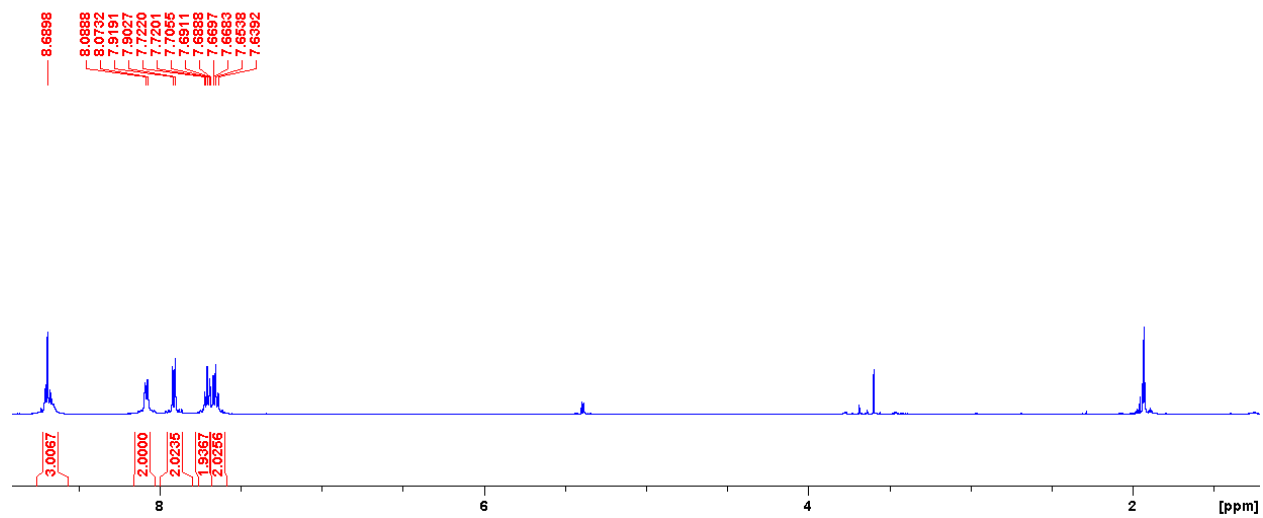

<sup>1</sup>H NMR of compound 6.

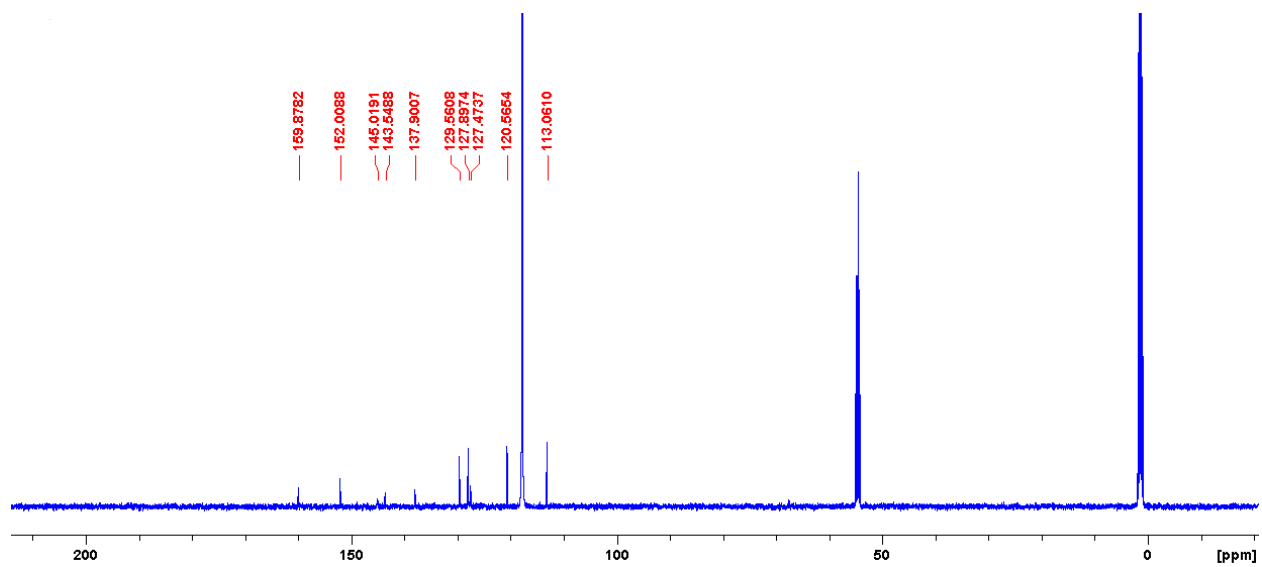

<sup>13</sup>C NMR of compound 6.

Compound 7:

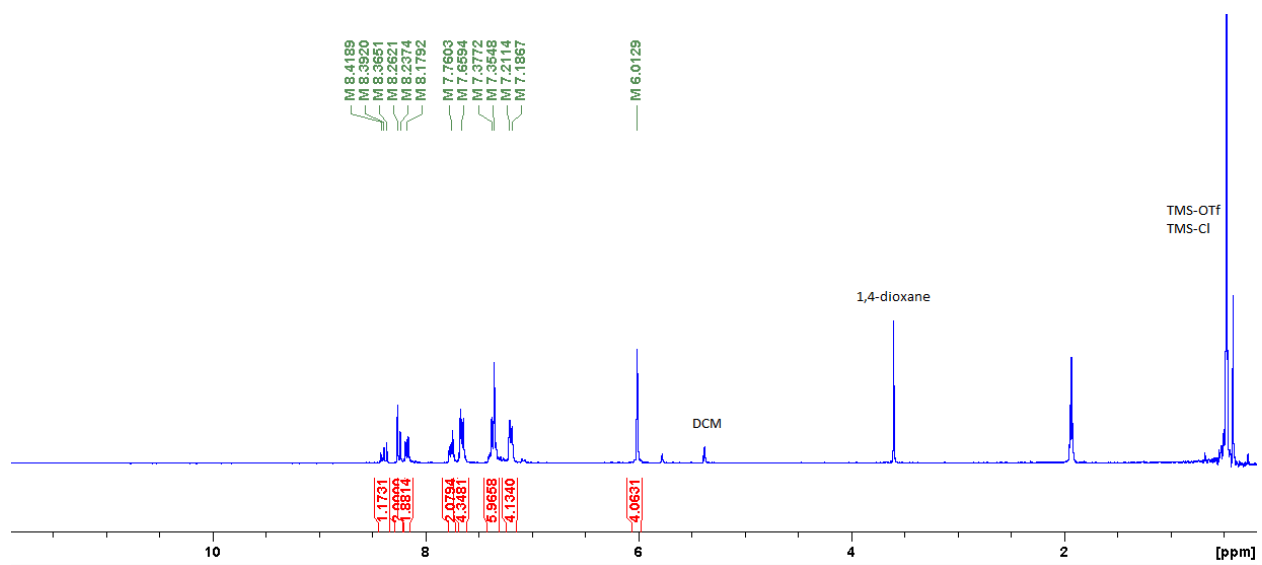

<sup>1</sup>H NMR of compound 7.

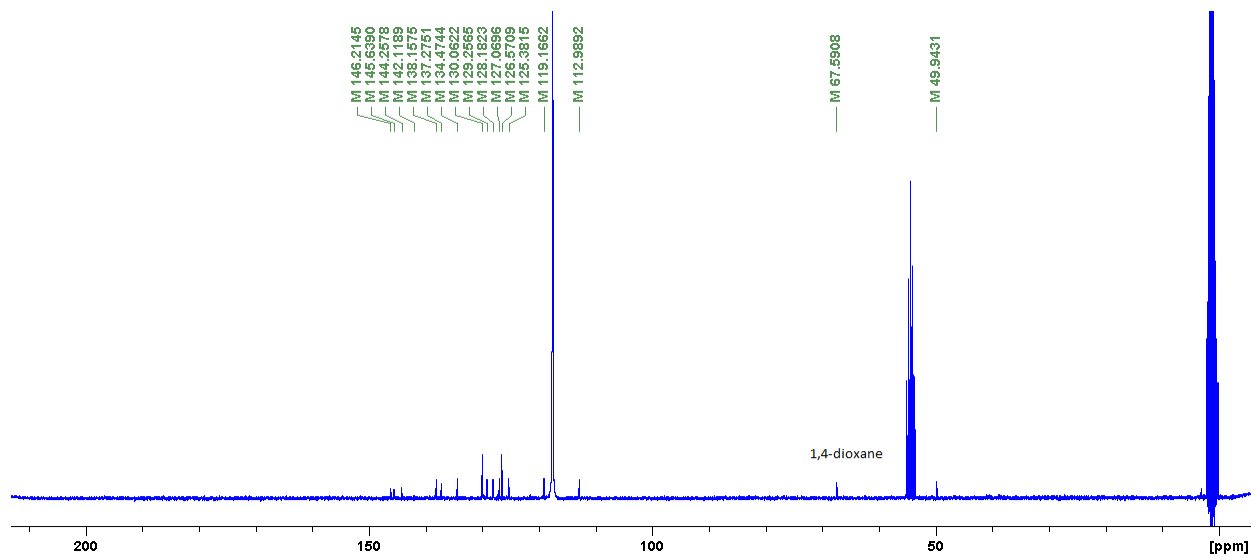

<sup>13</sup>C NMR of compound 7.

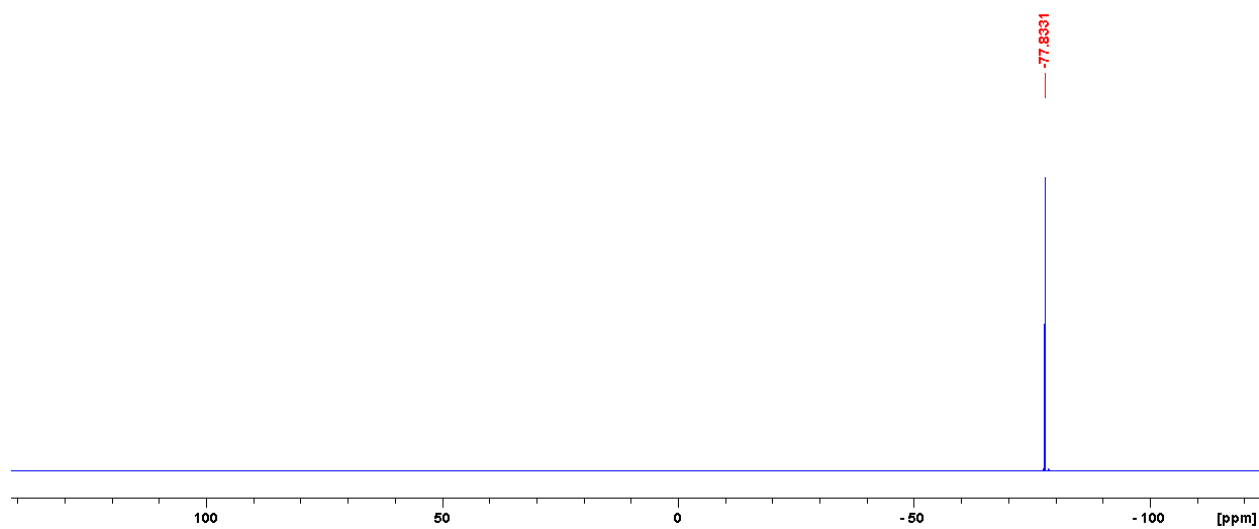

<sup>19</sup>F NMR of compound 7.

Compound 8:

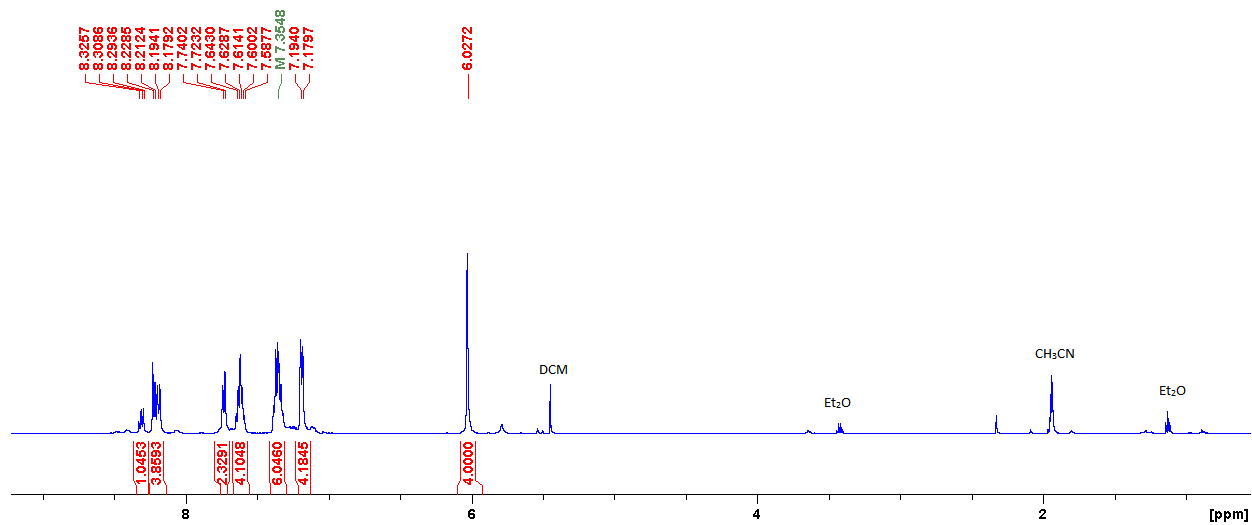

<sup>1</sup>H NMR of compound **8**.

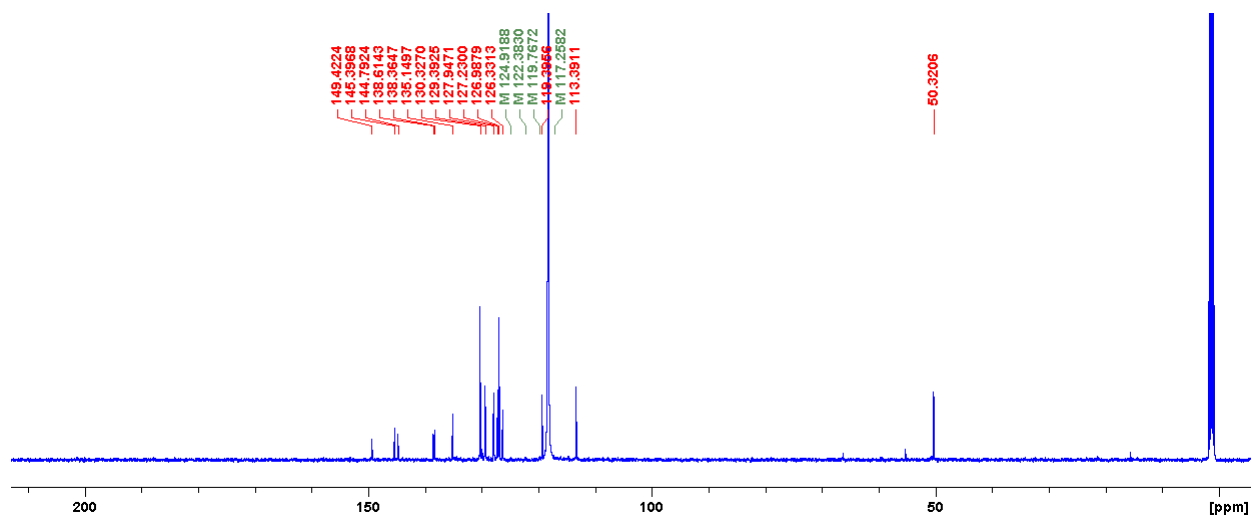

<sup>13</sup>C NMR of compound **8**.

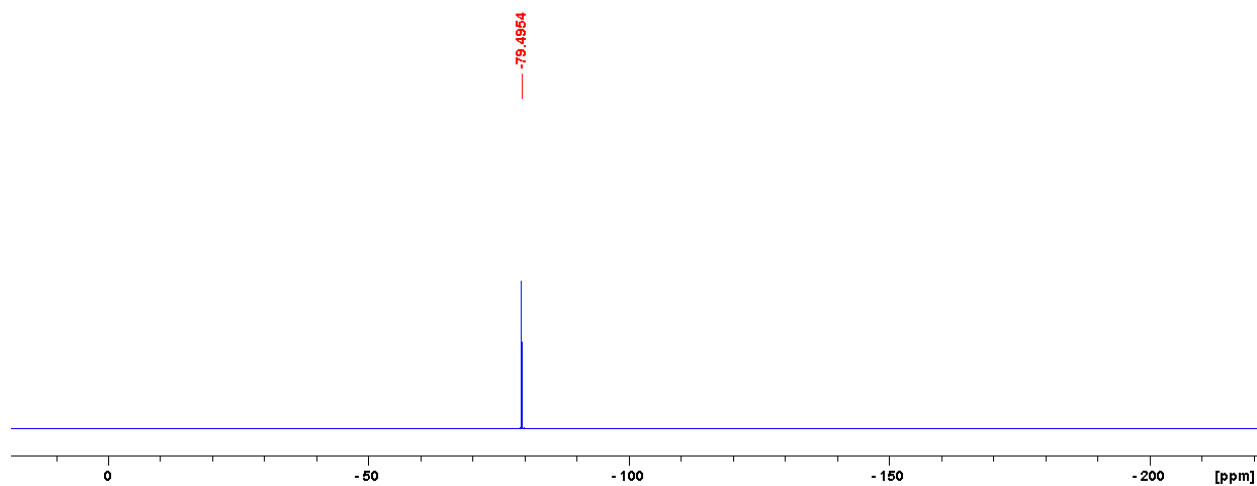

<sup>19</sup>F NMR of compound **8**.

## References

- 1 M. J. Frisch, G. W. Trucks, H. B. Schlegel, G. E. Scuseria, M. A. Robb, J. R. Cheeseman, G. Scalmani, V. Barone, B. Mennucci, G. A. Petersson, H. Nakatsuji, M. Caricato, X. Li, H. P. Hratchian, A. F. Izmaylov, J. Bloino, G. Zheng, J. L. Sonnenberg, M. Hada, M. Ehara, K. Toyota, R. Fukuda, J. Hasegawa, M. Ishida, T. Nakajima, Y. Honda, O. Kitao, H. Nakai, T. Vreven, J. A. Montgomery, J., J. E. Peralta, F. Ogliaro, M. Bearpark, J. J. Heyd, E. Brothers, K. N. Kudin, V. N. Staroverov, R. Kobayashi, J. Normand, K. Raghavachari, A. Rendell, J. C. Burant, S. S. Iyengar, J. Tomasi, M. Cossi, N. Rega, N. J. Millam, M. Klene, J. E. Knox, J. B. Cross, V. Bakken, C. Adamo, J. Jaramillo, R. Gomperts, R. E. Stratmann, O. Yazyev, A. J. Austin, R. Cammi, C. Pomelli, J. W. Ochterski, R. L. Martin, K. Morokuma, V. G. Zakrzewski, G. A. Voth, P. Salvador, J. J. Dannenberg, S. Dapprich, A. D. Daniels, Ö. Farkas, J. B. Foresman, J. V. Ortiz, J. Cioslowski and D. J. Fox, *Gaussian 09*, Gaussian, Inc., Wallingford CT, 2009.
- 2 Y. Zhao and D. G. Truhlar, *Theor. Chem. Acc.*, 2008, **120**, 215–241.
- 3 T. H. Dunning, *J. Chem. Phys.*, 1989, **90**, 1007–1023.
- 4 D. E. Woon and T. H. Dunning, *J. Chem. Phys.*, 1993, **98**, 1358–1371.
- 5 *Gaussview 3.0*, Gaussian Inc, Pittsburgh, 2003.
- 6 A. E. Reed, L. A. Curtiss and F. Weinhold, *Chem. Rev.*, 1988, **88**, 899–926.
- 7 E. D. Glendening, J. K. Badenhoop, A. E. Reed, J. E. Carpenter, J. A. Bohmann, C. M. Morales, C. R. Landis and F. Weinhold, *NBO 6.0*, Theoretical Chemistry Institute, University of Wisconsin, Madison, WI, 2013.
- 8 W. Humphrey, A. Dalke and K. Schulten, *J. Mol. Graph.*, 1996, **14**, 33–38.
